# Supplementary material for: Protic ionic liquids tailored by different cationic structures for efficient chemical fixation of diluted and waste CO2 into cyclic carbonates
Source: Royal Society of Chemistry journal article supplement (doi:10.1039/d1nj00990g), 2021-01-01
Supplement: d1nj00990g1.pdf [file d1nj00990g1.pdf]

## Supporting information

### **Protic ionic liquids tailored by different cationic structures for the efficient chemical fixation of diluted and waste CO<sub>2</sub> into cyclic carbonates**

Wei Hui<sup>a</sup>, Xiang Wang<sup>a</sup>, Xiao-Ning Li<sup>a</sup>, Hai-Jun Wang<sup>a\*</sup>, Xue-Mei He<sup>b\*</sup>, Xin-Yi Xu<sup>c</sup>

*<sup>a</sup>The Key Laboratory of Food Colloids and Biotechnology, Ministry of Education, School of Chemical and Material Engineering, Jiangnan University, Wuxi 214122, China*

*<sup>b</sup>Department of Chemistry, School of Science, Jiangxi Agricultural University, Nanchang 330045, China*

*<sup>c</sup>School of Chemistry and Molecular Engineering, East China Normal University, Shanghai 200062, China*

\*Corresponding author: E-mail: wanghj@jiangnan.edu.cn; hexuemei@iccas.ac.cn

**[DBUH]Br:**  $^1\text{H}$  NMR (400 MHz,  $\text{CDCl}_3$ ):  $\delta_{\text{H}}$  (ppm) 9.58 (s, 1H), 3.76-3.74 (d, 2H), 3.58-3.41 (m, 6H), 2.68-2.63 (d, 2H), 2.33-2.29 (m, 2H), 1.94-1.81 (d, 6H).  $^{13}\text{C}$  NMR (101 MHz,  $\text{CDCl}_3$ ):  $\delta_{\text{C}}$  (ppm), 165.44, 53.53, 47.92, 39.64, 37.46, 31.57, 28.20, 25.84, 23.23, 18.84.

**[AIDBU]Br:**  $^1\text{H}$  NMR (400 MHz,  $\text{CDCl}_3$ ):  $\delta_{\text{H}}$  (ppm) 5.86-5.76 (m, 1H), 5.29-5.19 (m, 2H), 4.22-4.20 (d, 2H), 3.75-3.60 (m, 6H), 2.86-2.83 (d, 2H), 2.18-2.13 (m, 2H) 1.77 (s, 6H).  $^{13}\text{C}$  NMR (101 MHz,  $\text{CDCl}_3$ ):  $\delta_{\text{C}}$  (ppm), 167.33, 130.53, 118.23, 56.06, 55.87, 49.60, 47.35, 29.23, 28.59, 26.15, 22.99, 20.34.

**[DBUH]Cl:**  $^1\text{H}$  NMR (400 MHz,  $\text{CDCl}_3$ ):  $\delta_{\text{H}}$  (ppm) 10.45 (s, 1H), 3.92-3.90 (d, 2H), 3.81-3.69 (m, 6H), 2.82-2.77 (d, 2H), 2.47-2.44 (m, 2H), 1.83-1.72 (d, 6H).  $^{13}\text{C}$  NMR (101 MHz,  $\text{CDCl}_3$ ):  $\delta_{\text{C}}$  (ppm), 165.58, 53.50, 47.93, 39.54, 37.85, 31.71, 28.53, 25.82, 23.47, 18.86.

**[MimH]Br:**  $^1\text{H}$  NMR (400 MHz,  $\text{DMSO-d}_6$ ):  $\delta_{\text{H}}$  (ppm) 8.74 (s, 1H), 7.51 (s, 2H), 3.99 (s, 3H).  $^{13}\text{C}$  NMR (101 MHz,  $\text{DMSO-d}_6$ ):  $\delta_{\text{C}}$  (ppm) 135.87, 123.91, 119.71, 39.59, 35.58.

**[TMGH]Br:**  $^1\text{H}$  NMR (400 MHz,  $\text{D}_2\text{O}$ ):  $\delta_{\text{H}}$  (ppm) 3.13 (s, 12H).  $^{13}\text{C}$  NMR (101 MHz,  $\text{D}_2\text{O}$ ):  $\delta_{\text{C}}$  (ppm) 161.40, 39.10.

**[AITMG]Br:**  $^1\text{H}$  NMR (400 MHz,  $\text{CDCl}_3$ ): 6.08-5.77 (m, 1H), 5.36-5.13 (m, 2H), 3.94-3.81 (m, 2H), 3.08 (d, 4H), 2.87 (s, 8H).  $^{13}\text{C}$  NMR (101 MHz,  $\text{CDCl}_3$ ):  $\delta_{\text{C}}$  (ppm), 162.90, 161.79, 138.17, 135.89, 133.57, 129.22, 127.01, 115.07, 53.32, 41.20, 40.52, 40.28.

**[4-VBTMG]Cl:**  $^1\text{H}$  NMR (400 MHz,  $\text{CDCl}_3$ ):  $\delta_{\text{H}}$  (ppm) 7.46 (d, 2H), 7.23 (d, 2H),

6.76-6.69 (q, 1H), 5.79 (d, 1H), 5.32 (d, 2H), 4.35 (d, 1H), 3.96 (d, 1H), 3.23 (s, 2H), 3.13 (s, 2H) 3.06 (s, 8H).  $^{13}\text{C}$  NMR (101 MHz,  $\text{CDCl}_3$ ):  $\delta_{\text{C}}$  (ppm), 162.90, 161.79, 138.17, 135.89, 133.52, 129.22, 127.01, 115.07, 53.32, 41.20, 40.52, 40.28.

**[DABCOH]Br:**  $^1\text{H}$  NMR (400 MHz,  $\text{DMSO-d}_6$ ):  $\delta_{\text{H}}$  (ppm) 3.07 (s, 12H).  $^{13}\text{C}$  NMR (101 MHz,  $\text{DMSO-d}_6$ ):  $\delta_{\text{C}}$  (ppm) 44.10, 39.43.

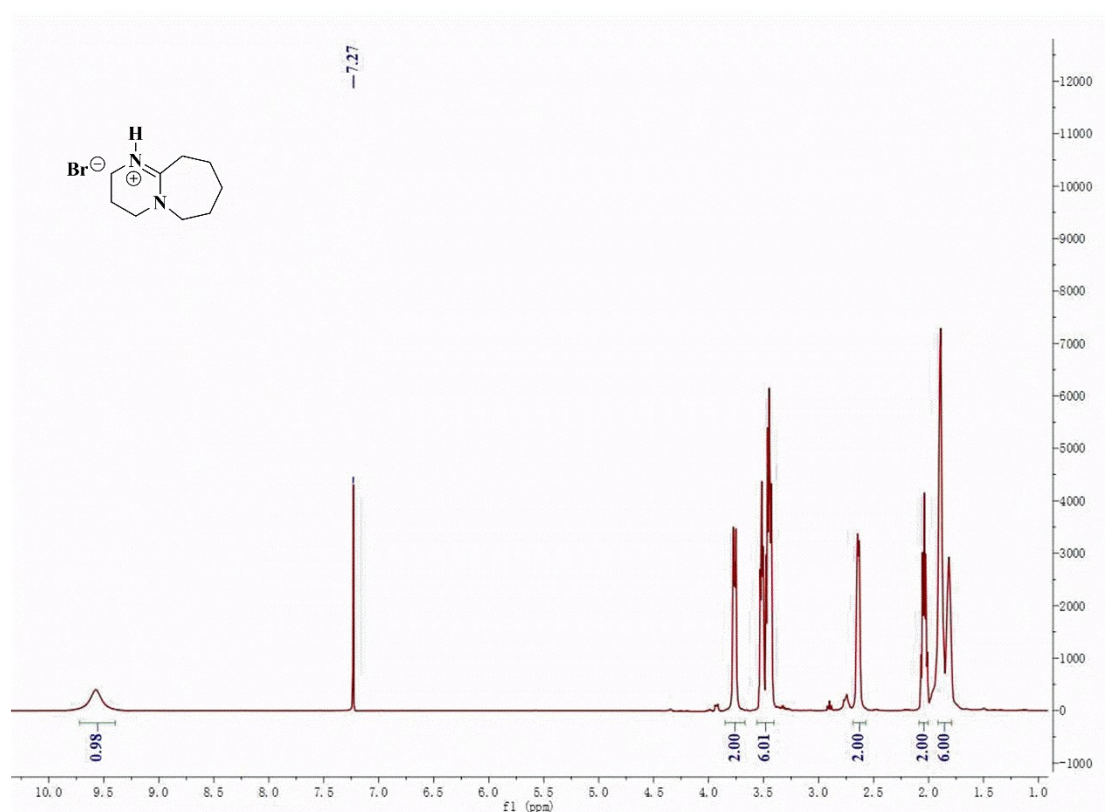

**Figure S1.** The  $^1\text{H}$  NMR spectrum of [DBUH]Br.

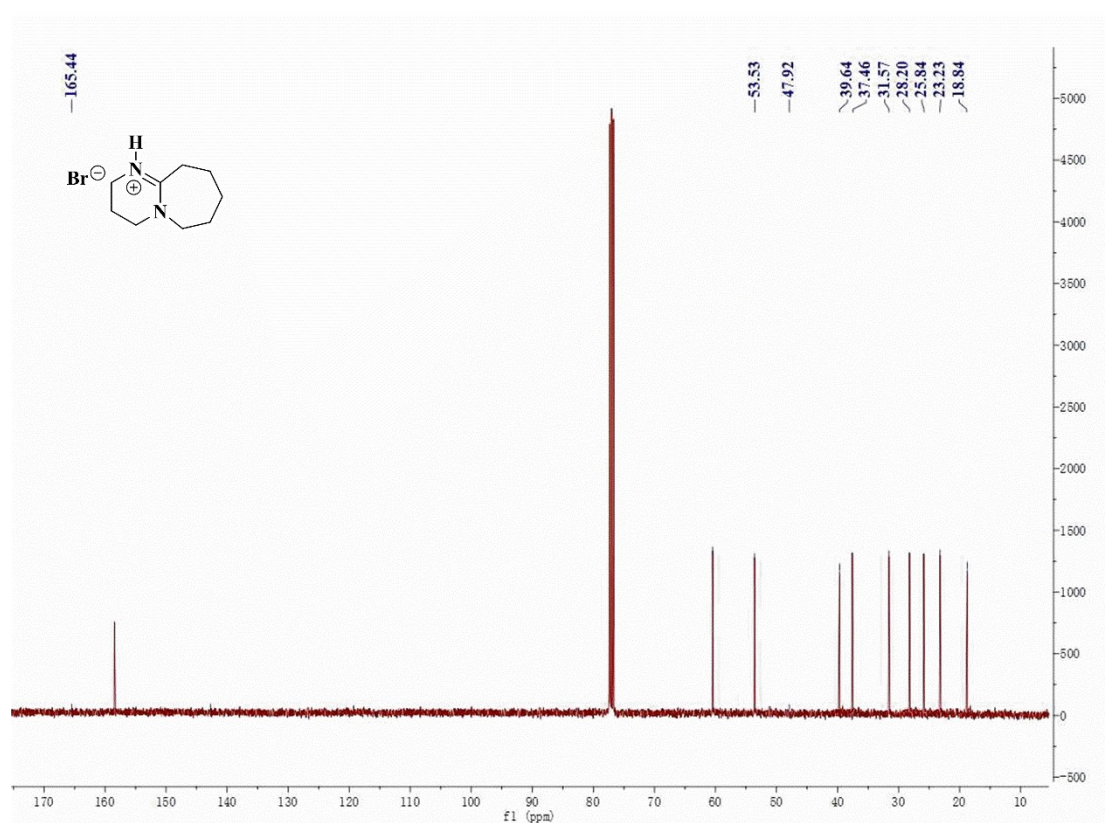

**Figure S2.** The  $^{13}\text{C}$  NMR spectrum of [DBUH]Br.

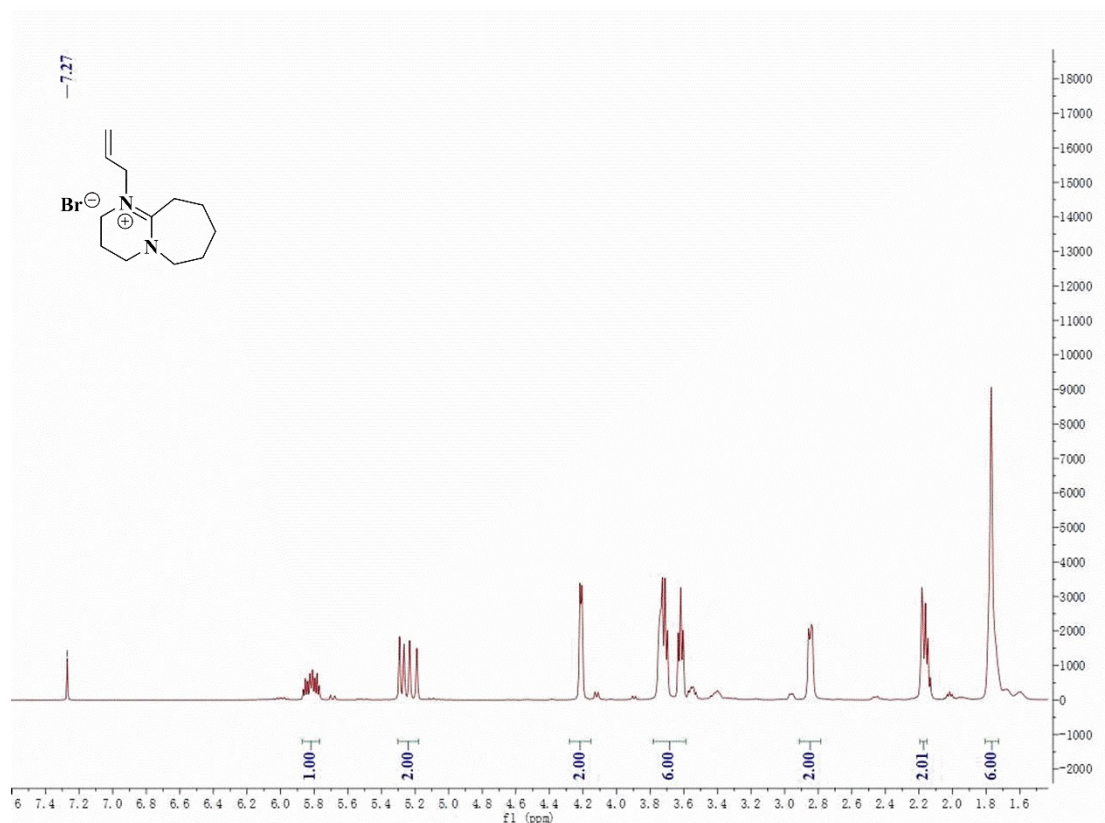

**Figure S3.** The <sup>1</sup>H NMR spectrum of [AIDBU]Br.

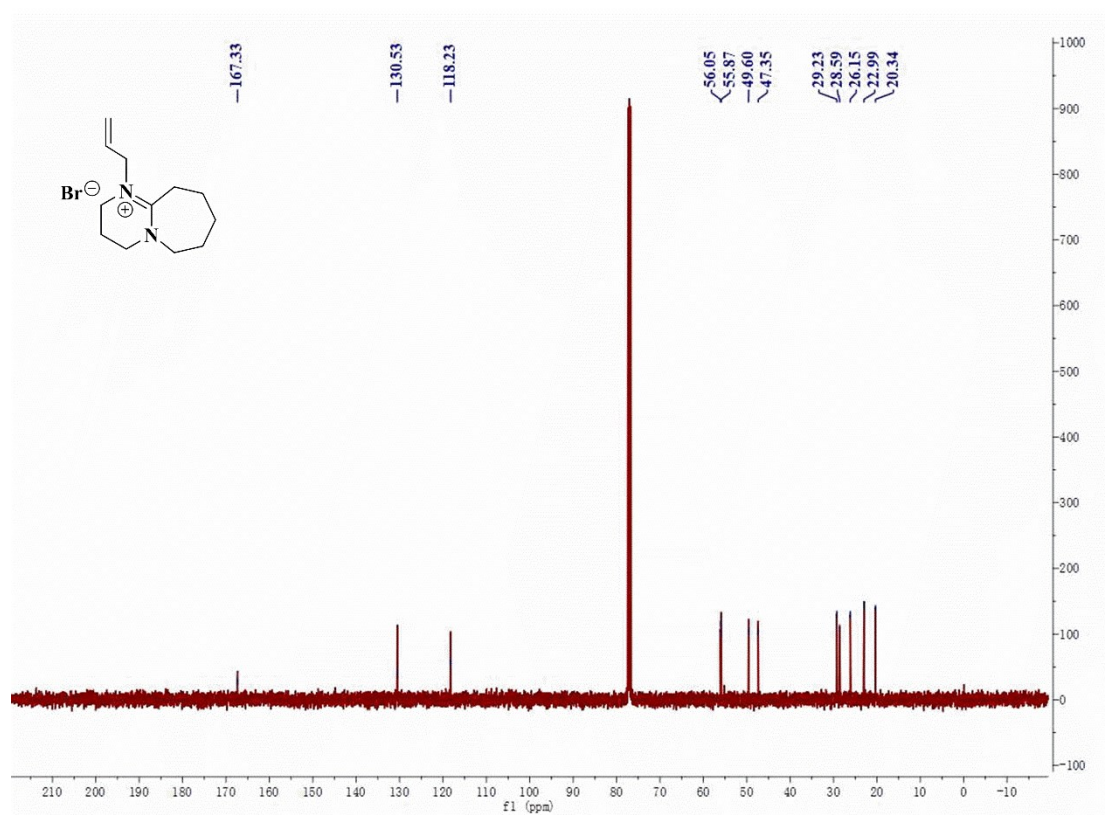

**Figure S4.** The <sup>13</sup>C NMR spectrum of [AIDBU]Br.



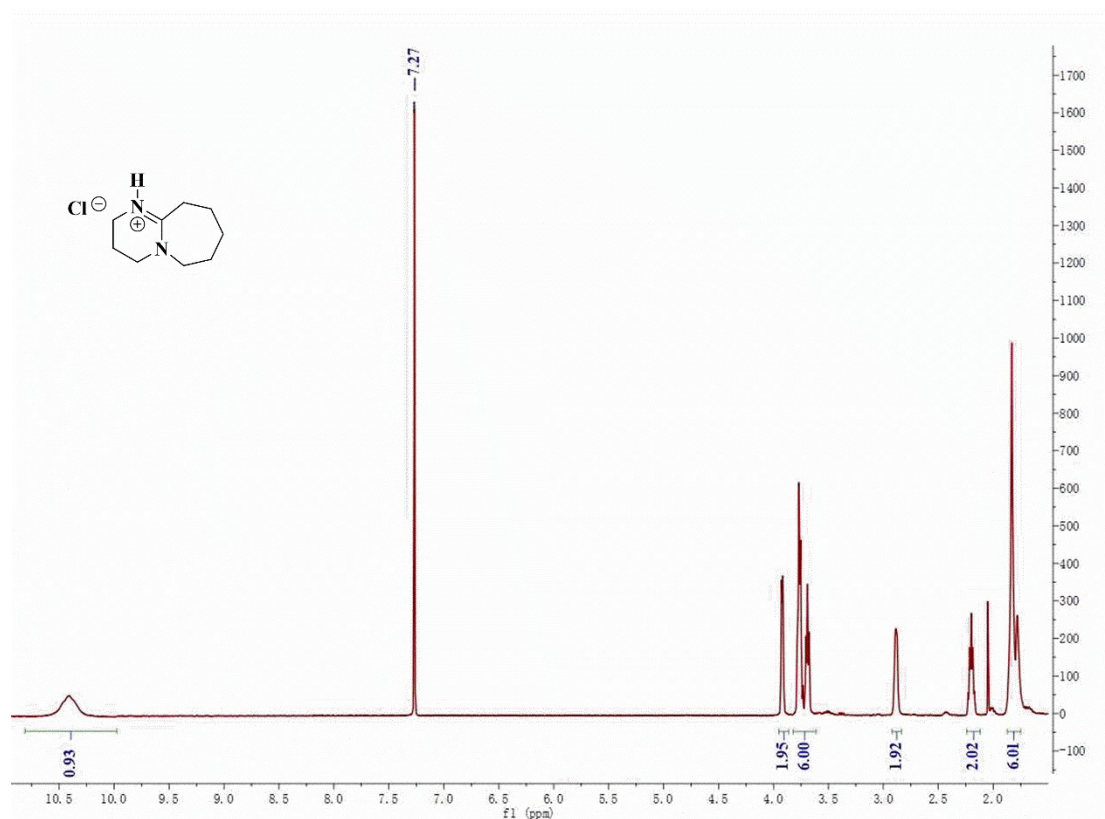

**Figure S5.** The  $^1\text{H}$  NMR spectrum of [DBUH]Cl.

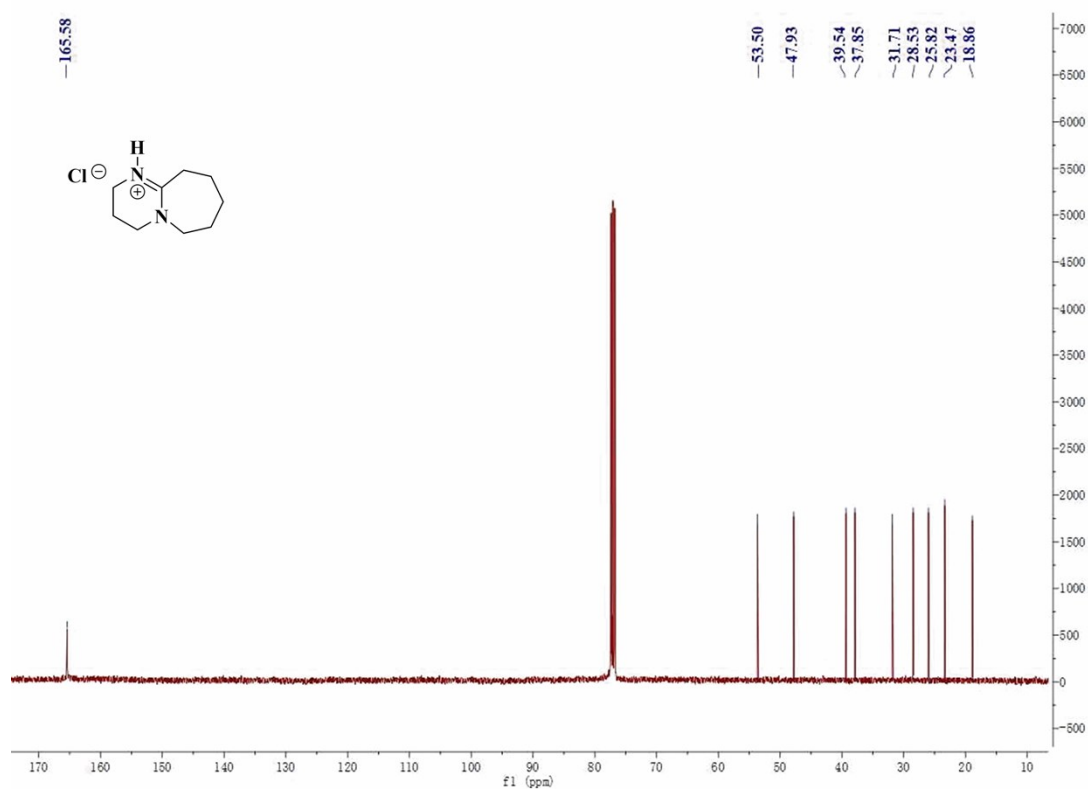

**Figure S6.** The  $^{13}\text{C}$  NMR spectrum of [DBUH]Cl.

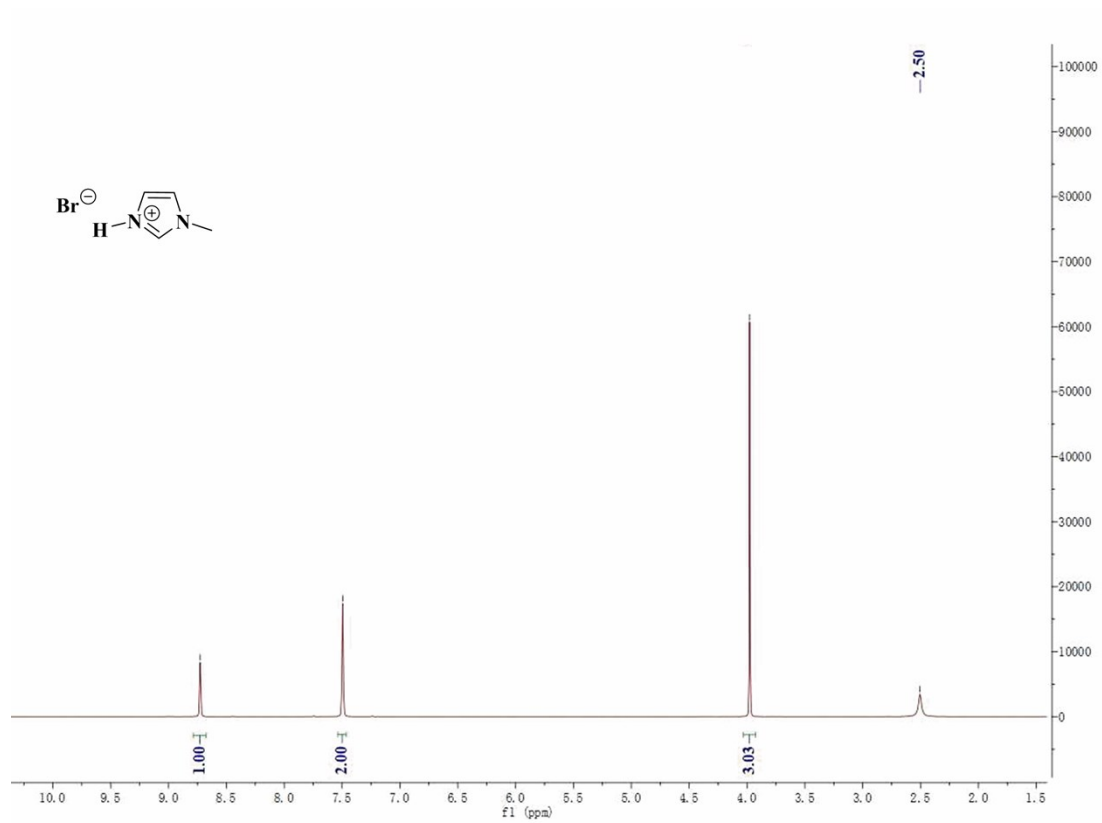

**Figure S7.** The  $^1\text{H}$  NMR spectrum of  $[\text{MimH}]\text{Br}$ .

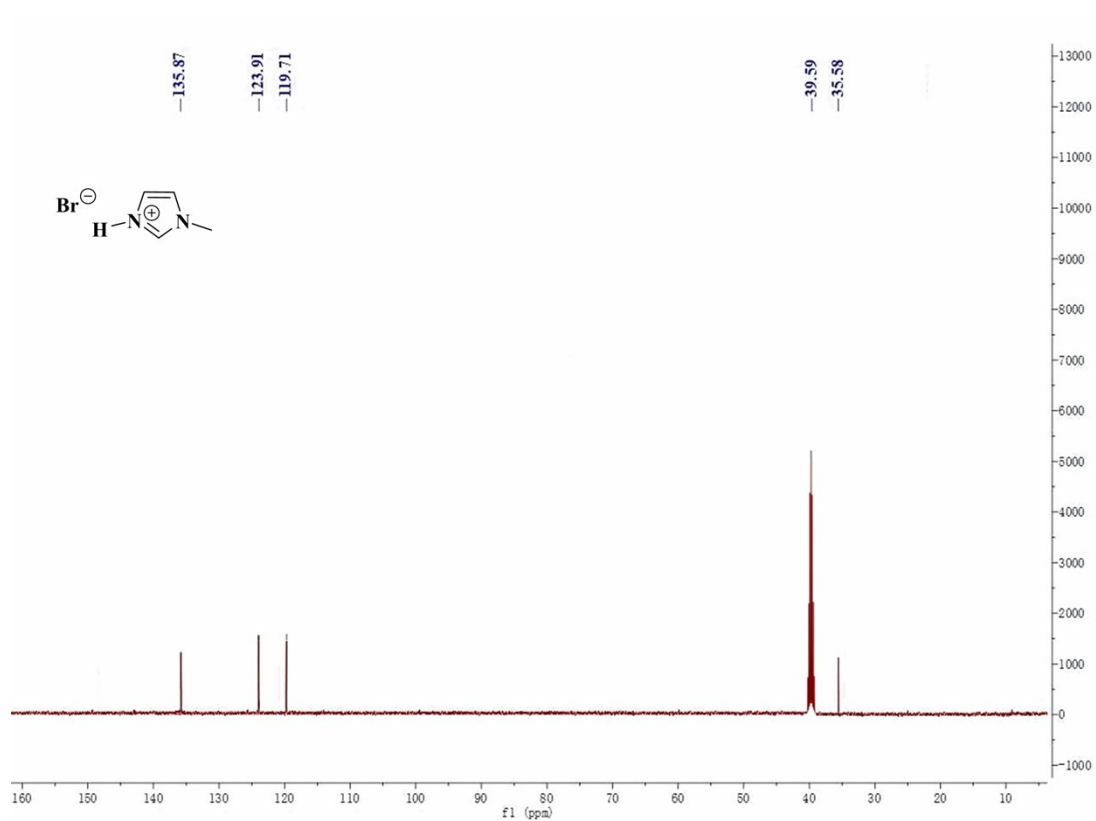

**Figure S8.** The  $^{13}\text{C}$  NMR spectrum of  $[\text{MimH}]\text{Br}$ .

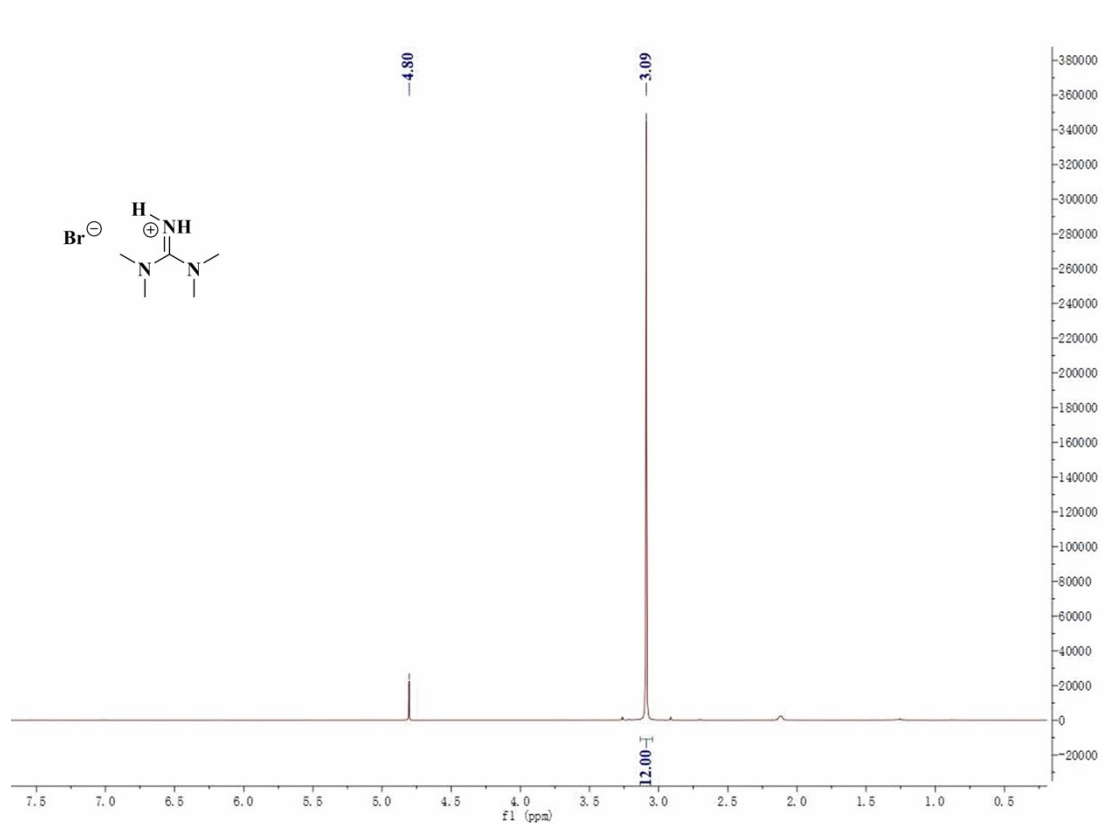

**Figure S9.** The  $^1\text{H}$  NMR spectrum of [TMGH]Br.

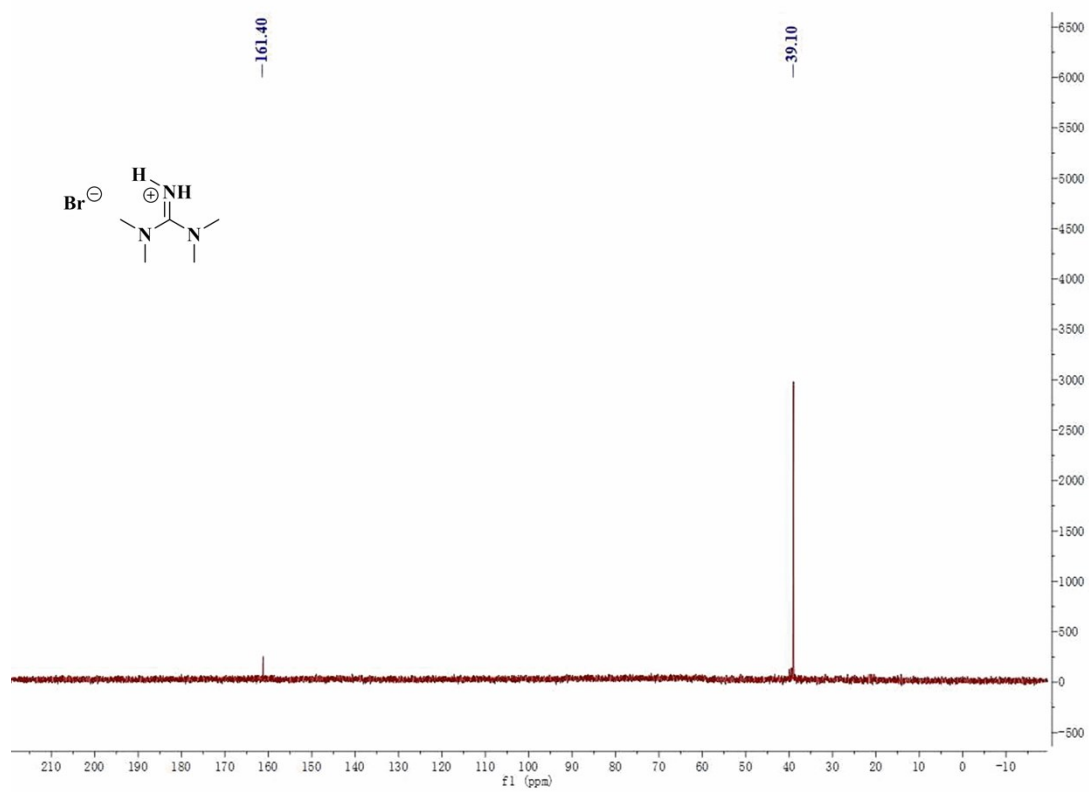

**Figure S10.** The  $^{13}\text{C}$  NMR spectrum of [TMGH]Br.



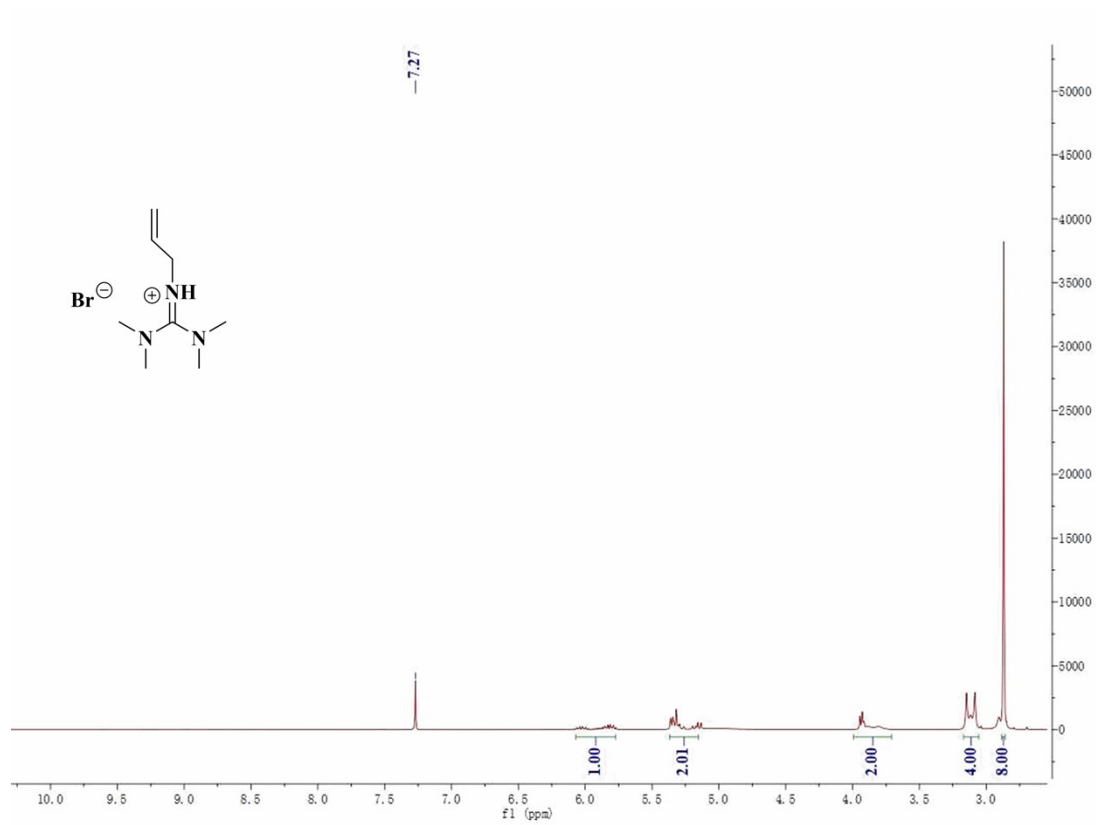

**Figure S11.** The  $^1\text{H}$  NMR spectrum of [AITMG]Br.

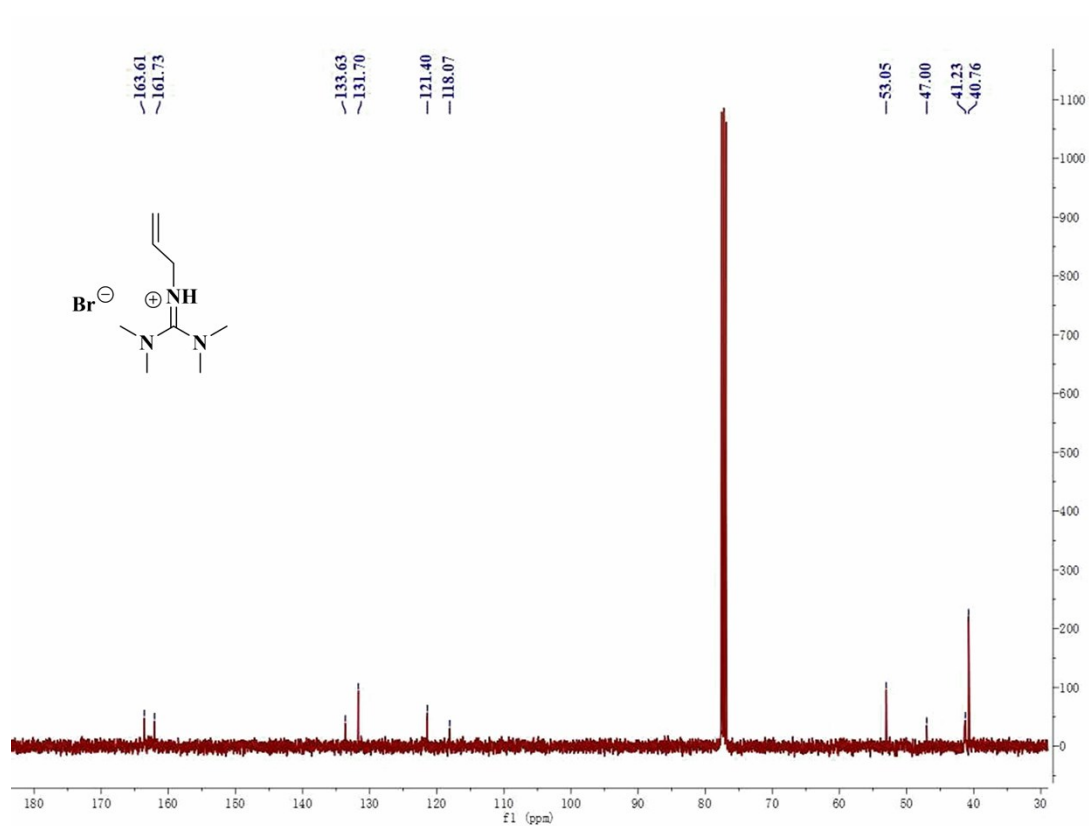

**Figure S12.** The  $^{13}\text{C}$  NMR spectrum of [AITMG]Br.

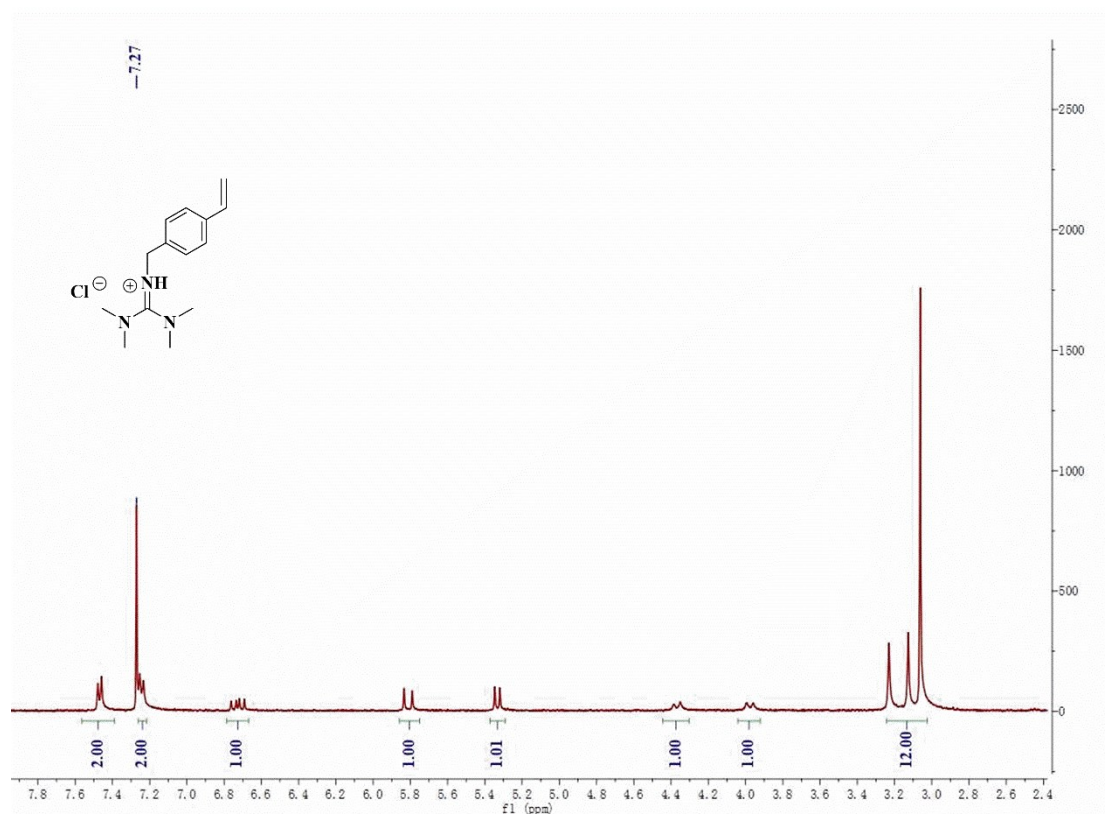

**Figure S13.** The <sup>1</sup>H NMR spectrum of [VBTMG]Cl.

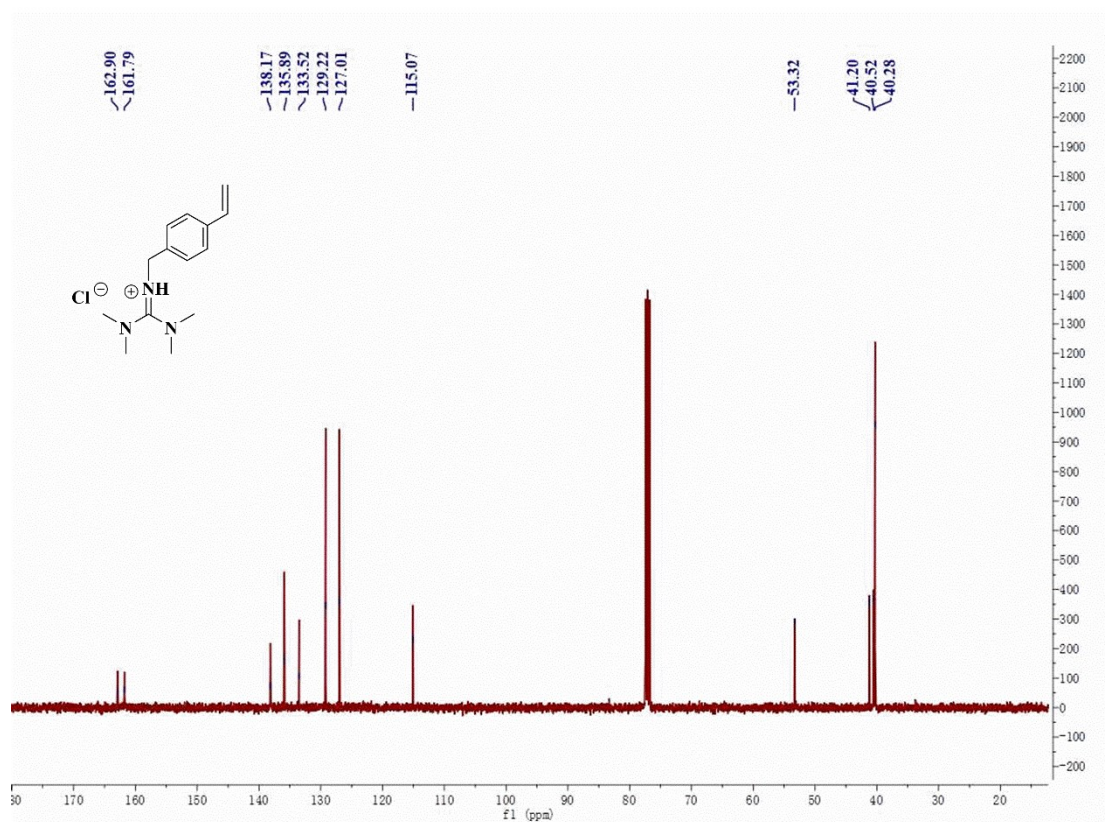

**Figure S14.** The <sup>13</sup>C NMR spectrum of [VBTMG]Cl.

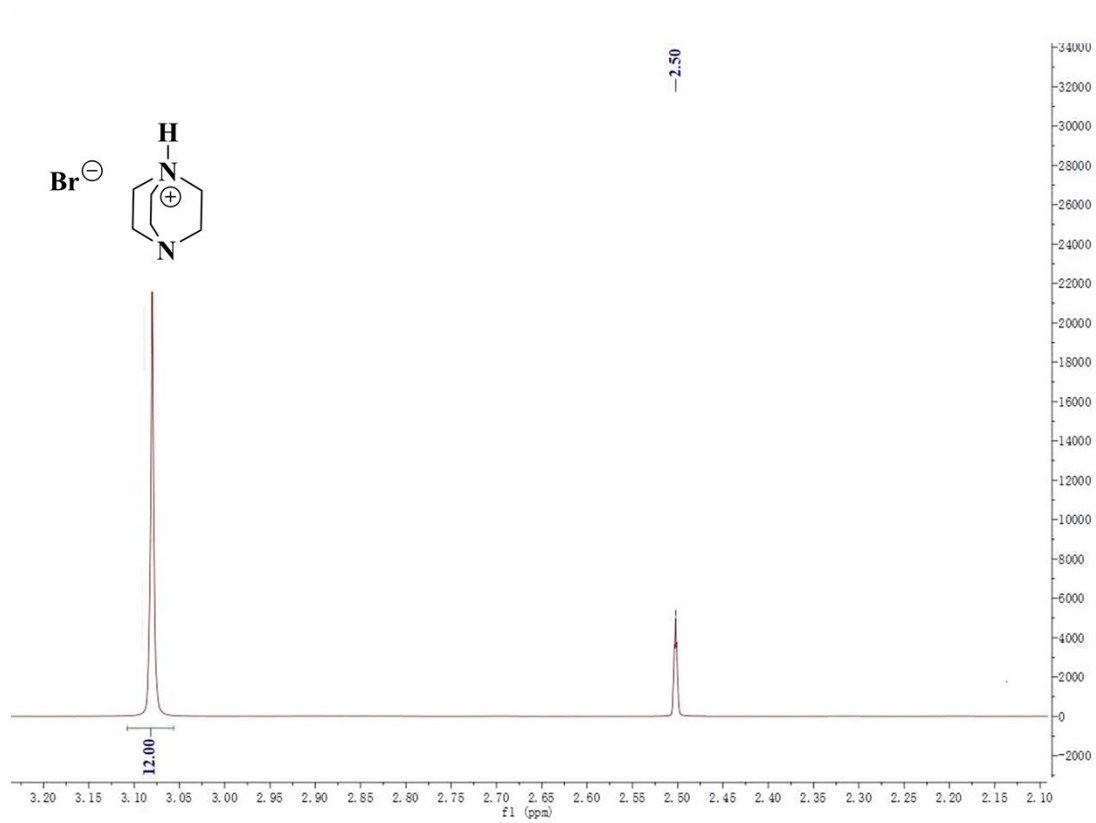

**Figure S15.** The  $^1\text{H}$  NMR spectrum of [DABCOH] $\text{Br}$ .

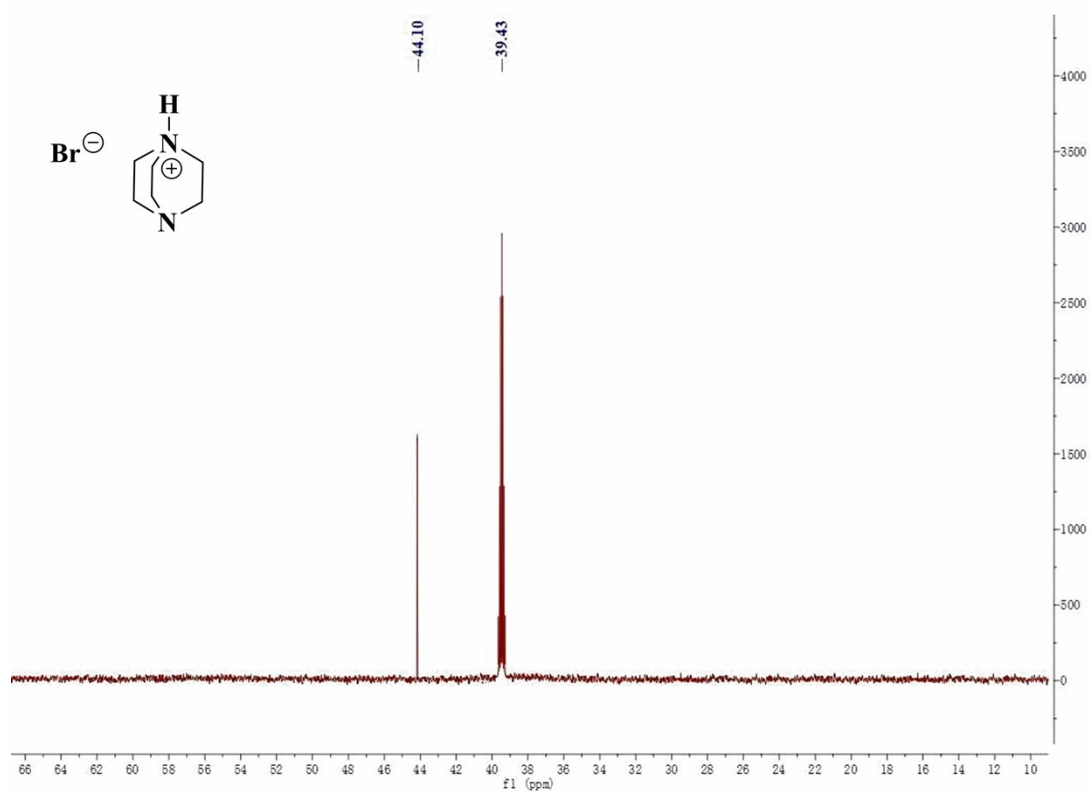

**Figure S16.** The  $^{13}\text{C}$  NMR spectrum of [DABCOH] $\text{Br}$ .

## Computation details

To understand the structures and interactions of CO<sub>2</sub> and SO with the ILs ([DBUH]Cl, [DBUH]Br, [TMGH]Br, [DABCOH]Br, [MimH]Br, [VBTGM]Cl, [AITGM]Br, [AIDBU]Br and tetrabutylammonium bromide TBAB) used in the present work, geometric optimizations were carried out for free CO<sub>2</sub>, SO, all the ionic liquids and their corresponding complexes. Frequency calculations of these systems were carried out at the same theoretical level of M06/6-311+G(2d, 2p) [S1]. The binding energy of different ionic liquid-CO<sub>2</sub> complexes and ionic liquid-SO complexes were evaluated by the enthalpy change,  $\Delta H = H_{\text{gas},298.15 \text{ K}}(\text{complex}) - H_{\text{gas},298.15 \text{ K}}(\text{IL}) - H_{\text{gas},298.15 \text{ K}}(\text{CO}_2 \text{ or SO})$ . All calculations were carried out using Gaussian [S2].

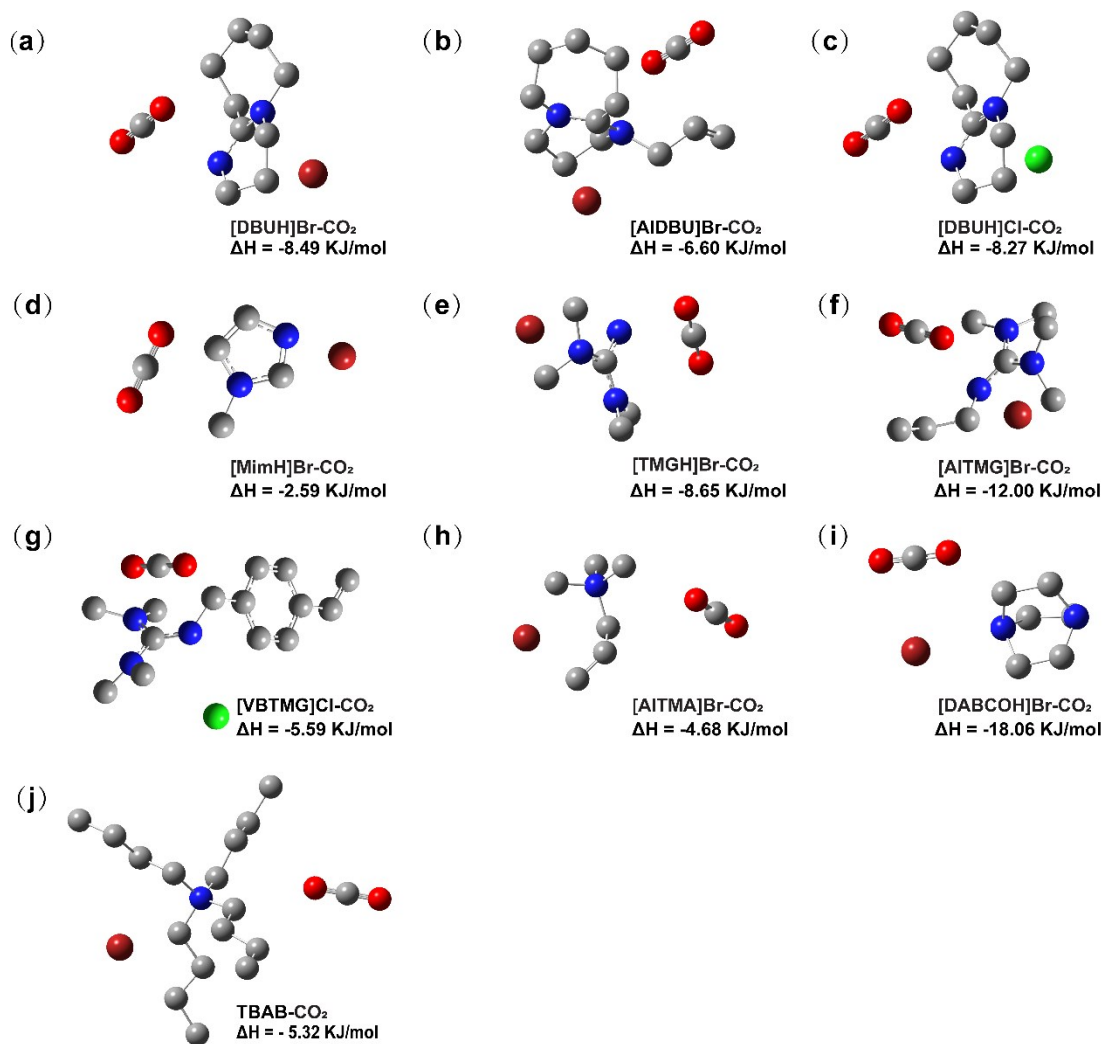

**Figure S17.** (a) [DBUH]Br-CO<sub>2</sub>, (b) [AIDBU]Br-CO<sub>2</sub>, (c) [DBUH]Cl-CO<sub>2</sub>, (d) [MimH]Br-CO<sub>2</sub>, (e) [TMGH]Br-CO<sub>2</sub>, (f) [AITMG]Br-CO<sub>2</sub>, (g) [VBTMG]Cl-CO<sub>2</sub>, (h) [AITMA]Br-CO<sub>2</sub>, (i) [DABCO]Br-CO<sub>2</sub>, and (j) TBAB-CO<sub>2</sub>. ΔH of interaction are also shown. C gray, O red, N blue, Br vermilion, Cl green.

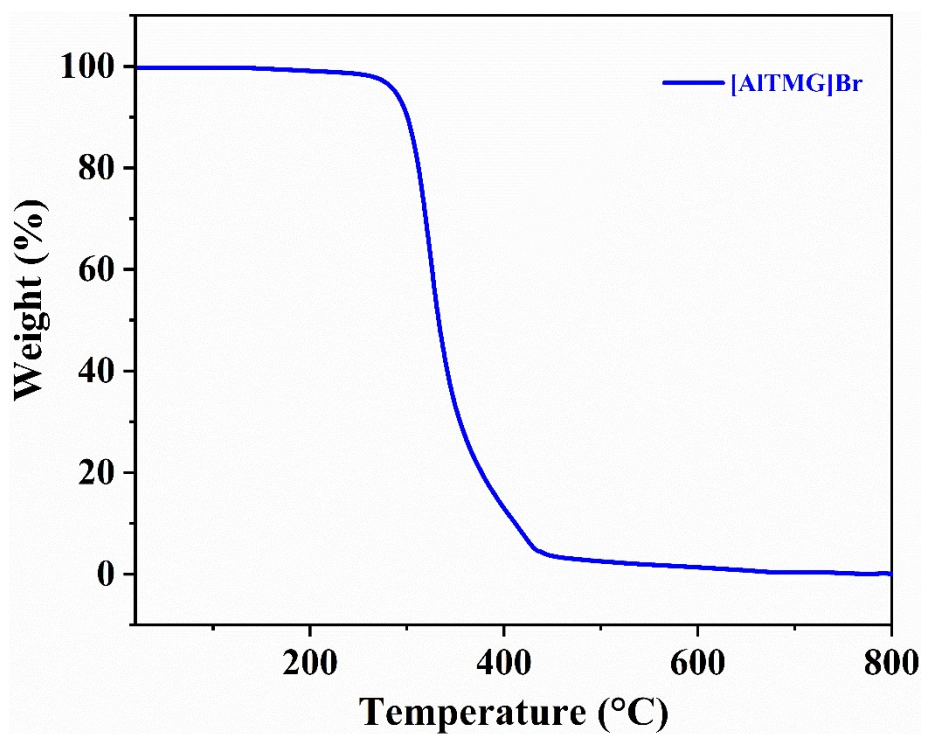

Figure S18. TGA curves of [AlTMG]Br.



**Table S1.** The optimization of reaction parameters for the cycloaddition of diluted CO<sub>2</sub> with SO using the [AlTMG]Br catalyst.<sup>a</sup>

| Entry | Temperature (°C) | Time (h) | Yield of SC (%) | Selectivity of SC (%) |
|-------|------------------|----------|-----------------|-----------------------|
| 1     | 80               | 24       | 7               | 99                    |
| 2     | 90               | 24       | 18              | 99                    |
| 3     | 100              | 24       | 31              | 99                    |
| 4     | 110              | 24       | 45              | 99                    |
| 5     | 120              | 24       | 53              | 99                    |
| 6     | 130              | 24       | 55              | 99                    |
| 7     | 100              | 32       | 58              | 99                    |
| 8     | 100              | 40       | 82              | 99                    |
| 9     | 100              | 48       | 99              | 99                    |

<sup>a</sup>Reaction conditions: SO (1.2 g, 10 mmol), CO<sub>2</sub> (1 bar, 15% CO<sub>2</sub>/85% N<sub>2</sub>), catalyst (1.5 mol%).

**Table S2.** Catalytic activity of various catalysts for cycloaddition of CO<sub>2</sub> with SO.

| Entry | Catalyst                                              | Additive          | Reaction conditions    | Yield (%) | Ref.      |
|-------|-------------------------------------------------------|-------------------|------------------------|-----------|-----------|
| 1     | [CBDMAPy]Br                                           | -                 | 20 bar, 130 °C, 1 h    | 85        | [S3]      |
| 2     | BnBimBr                                               | DEA               | 1 bar, 80 °C, 3 h      | 94        | [S4]      |
| 3     | DBPIL                                                 | -                 | 1 bar, 80 °C, 6 h      | 87        | [S5]      |
| 4     | [C <sub>1</sub> C <sub>4</sub> Im][HCO <sub>3</sub> ] | SH4-Al(Cl)        | 10 bar, 25 °C, 24 h    | 88        | [S6]      |
| 5     | NEt(HE) <sub>3</sub> Br                               | -                 | 15 bar, 130 °C, 2 h    | 97        | [S7]      |
| 6     | [DMAPH]Br                                             | -                 | 1 bar, 120 °C, 9 h     | 96        | [S8]      |
| 7     | BMImBr                                                | ZnCl <sub>2</sub> | 15 bar, 100 °C, 1 h    | 86        | [S9]      |
| 8     | Bu <sub>4</sub> NBr                                   | -                 | 30 bar, 100 °C, 2 h    | 56        | [S10]     |
| 9     | ZnBr <sub>2</sub>                                     | DMF               | 30 bar, 150 °C, 4 h    | 67        | [S11]     |
|       | [AlTMG]Br                                             | -                 | 1 bar, 100 °C, 8 h     | 99        |           |
| 8     | [AlTMG]Br                                             | -                 | 1 bar, 25 °C, 72 h     | 93        | This work |
|       | [AlTMG]Br                                             | -                 | 0.15 bar, 100 °C, 48 h | 99        |           |

## REFERENCES

- [S1] Y. Zhao, D.G. Theor. Chem. Acc. 119 (2008) 525-525.
- [S2] M. J. Frisch, G. W. Trucks, H. B. Schlegel, G. E. Scuseria, M. A. Robb, J. R. Cheeseman, G. Scalmani, V. Barone, B. Mennucci, G. A. Petersson, H. Nakatsuji, M. Caricato, X. Li, H. P. Hratchian, A. F. Izmaylov, J. Bloino, G. Zheng, J. L. Sonnenberg, M. Hada, M. Ehara, K. Toyota, R. Fukuda, J. Hasegawa, M. Ishida, T. Nakajima, Y. Honda, O. Kitao, H. Nakai, T. Vreven, J. A. Montgomery, Jr., J. E. Peralta, F. Ogliaro, M. Bearpark, J. J. Heyd, E. Brothers, K. N. Kudin, V. N. Staroverov, R. Kobayashi, J. Normand, K. Raghavachari, A. Rendell, J. C. Burant, S. S. Iyengar, J. Tomasi, M. Cossi, N. Rega, J. M. Millam, M. Klene, J. E. Knox, J. B. Cross, V. Bakken, C. Adamo, J. Jaramillo, R. Gomperts, R. E. Stratmann, O. Yazyev, A. J. Austin, R. Cammi, C. Pomelli, J. W. Ochterski, R. L. Martin, K. Morokuma, V. G. Zakrzewski, G. A. Voth, P. Salvador, J. J. Dannenberg, S. Dapprich, A. D. Daniels, O. Farkas, J. B. Foresman, J. V. Ortiz, J. Cioslowski, D. J. Fox, eds., Gaussian 09, revision a.02, Gaussian, Inc., Pittsburgh PA, 2009.
- [S3] X. Meng, H. He, Y. Nie, X. Zhang, S. Zhang, J. Wang, *ACS Sustain. Chem. Eng.*, 2017, **5**, 3081–3086.
- [S4] L. Ji, Z. Luo, Y. Zhang, R. Wang, Y. Ji, F. Xia, G. Gao, *Molecular Catalysis*, 2018, **446**, 124-130.
- [S5] X. Meng, Z. Ju, S. Zhang, X. Liang, N. von Solms, X. Zhang, X. Zhang, *Green Chem.*, 2019, **21**, 3456-3463.
- [S6] J. Liu, G. Yang, Y. Liu, D. Zhang, X. Hu, Z. Zhang, *Green Chem.*, 2020, **22**,

4509-4515.

[S7] W. Cheng, B. Xiao, J. Sun, K. Dong, P. Zhang, S. Zhang, F. T. T. Ng,

*Tetrahedron Lett.*, 2015, **56**, 1416-1419.

[S8] Z. Zhang, F. Fan, H. Xing, Q. Yang, Z. Bao, Q. Ren, *ACS Sustain. Chem. Eng.*,

2017, **5**, 2841-2846.

[S9] J. Sun, W. Cheng, W. Fan, Y. Wang, Z. Meng, S. Zhang, *Catal. Today*, 2009,

**148**, 361-367.

[S10] J.-Q. Wang, K. Dong, W.-G. Cheng, J. Sun, S.-J. Zhang, *Catal. Sci. Technol.*,

2012, **2**, 1480-1484.

[S11] S. Zhong, L. Liang, B. Liu, J. Sun, *J. CO2 Util.*, 2014, **6**, 75-79.
